# Supplementary material for: Dietary cysteine drives body fat loss via FMRFamide signaling in Drosophila and mouse
Source: PubMed Central journal article supplement (PMC10235132; doi:10.1038/s41422-023-00800-8), 2023-04-13
Supplement: 41422_2023_800_MOESM2_ESM.pdf [file 41422_2023_800_MOESM2_ESM.pdf]

**Fig. S2**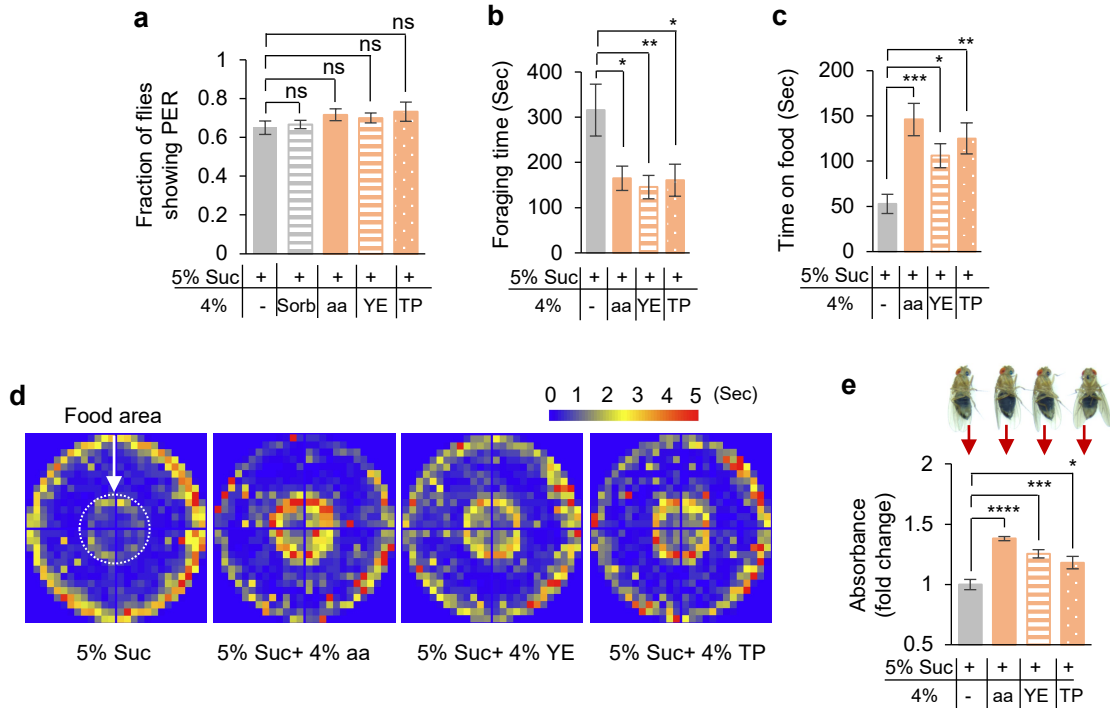**Fig. S2: HPD enhanced foraging behavior in flies.**

**a** Fraction of pre-starved (for 24 hours) flies showing PER responses to the indicated food types (n=6, groups each of 10 flies). **(b-d)** Flies pre-fed with different types of HPD in the video recording-based food seeking assay. HPD-fed flies were starved for 6 hours and then transferred into a behavioral chamber with a small food patch (5% sucrose) in the center, and their positions were recorded by a camera placed on top and analyzed by a custom computer program (n=41-59). **b** Latency to reach the food source. **c** Total duration on food. **d** Represent spatial distribution during the 10-minute assay. **e** Food consumption of flies. Flies were pre-fed with different types of HPD for 5 days, starved for 12 hours, and then presented with 5% sucrose (containing 0.5% Brilliant Blue) for 10 min (n=6-13). \*p < 0.05; \*\*p < 0.01; \*\*\*p < 0.001; \*\*\*\*p < 0.0001. One-way followed by post hoc test with Bonferroni correction was used for multiple comparisons when applicable.
