# Supplementary material for: Dietary cysteine drives body fat loss via FMRFamide signaling in Drosophila and mouse
Source: PubMed Central journal article supplement (PMC10235132; doi:10.1038/s41422-023-00800-8), 2023-04-13
Supplement: 41422_2023_800_MOESM4_ESM.pdf [file 41422_2023_800_MOESM4_ESM.pdf]

**Fig. S4**

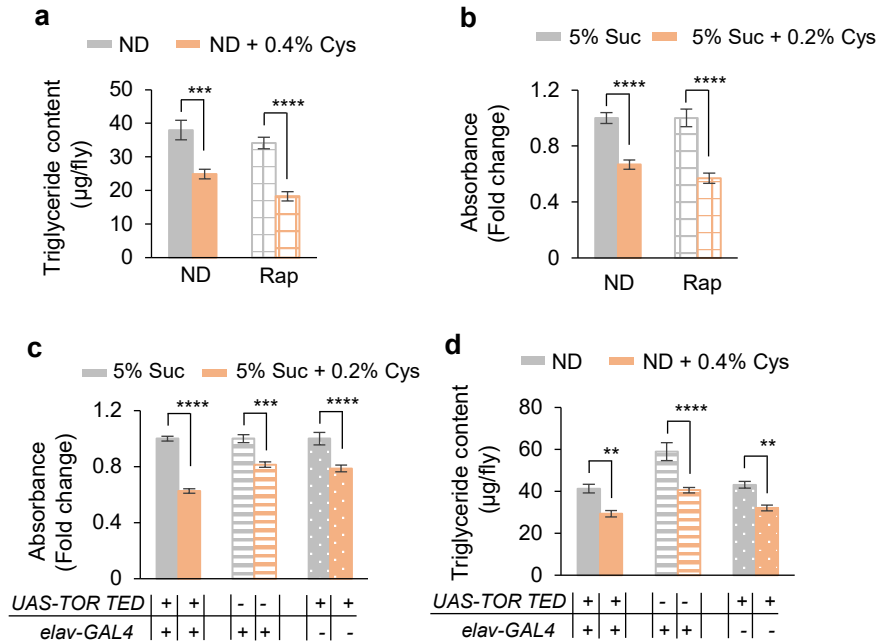

**Fig. S4: TOR signaling was not related to cysteine-induced fat loss and feeding suppression.**

**a** Triglyceride content of rapamycin (400  $\mu$ M)-treated flies with or without cysteine for 3 days (n=6). **b** Consumption of 5% sucrose or 5% sucrose added with cysteine of indicated flies (n=6). **c** Consumption of 5% sucrose or 5% sucrose added with cysteine of flies of the indicated genotypes (n=6). **d** Triglyceride content (n=6-8) of flies of the indicated genotypes fed with ND or ND added with 0.2% cysteine for 5 days. \*\*p < 0.01; \*\*\*p < 0.001; \*\*\*\*p < 0.0001. One-way followed by post hoc test with Bonferroni correction was used for multiple comparisons when applicable.
