# Supplementary material for: Dietary cysteine drives body fat loss via FMRFamide signaling in Drosophila and mouse
Source: PubMed Central journal article supplement (PMC10235132; doi:10.1038/s41422-023-00800-8), 2023-04-13
Supplement: 41422_2023_800_MOESM6_ESM.pdf [file 41422_2023_800_MOESM6_ESM.pdf]

**Fig. S6**

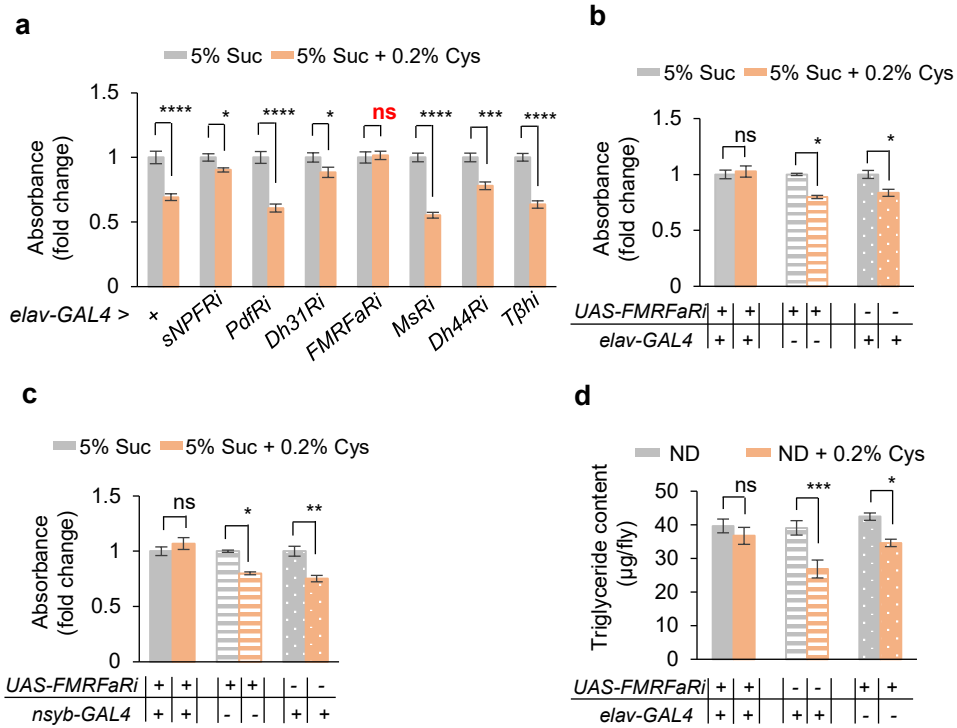

**Fig. S6: Neuronal FMRFaR mediated the inhibitory effect of cysteine on feeding behavior.**

(a-c) Consumption of 5% sucrose or 5% sucrose added with cysteine of flies of the indicated genotypes (n=5-9). **d** Triglyceride content of flies of the indicated genotypes fed with ND or ND added with 0.2% cysteine for 5 days (n=7-8). ns,  $p > 0.05$ ; \* $p < 0.05$ ; \*\* $p < 0.01$ ; \*\*\* $p < 0.001$ ; \*\*\*\* $p < 0.0001$ . One-way ANOVA followed by post hoc test with Bonferroni correction were used for multiple comparisons when applicable.
