# Supplementary material for: Dietary cysteine drives body fat loss via FMRFamide signaling in Drosophila and mouse
Source: PubMed Central journal article supplement (PMC10235132; doi:10.1038/s41422-023-00800-8), 2023-04-13
Supplement: 41422_2023_800_MOESM7_ESM.pdf [file 41422_2023_800_MOESM7_ESM.pdf]

**Fig. S7**

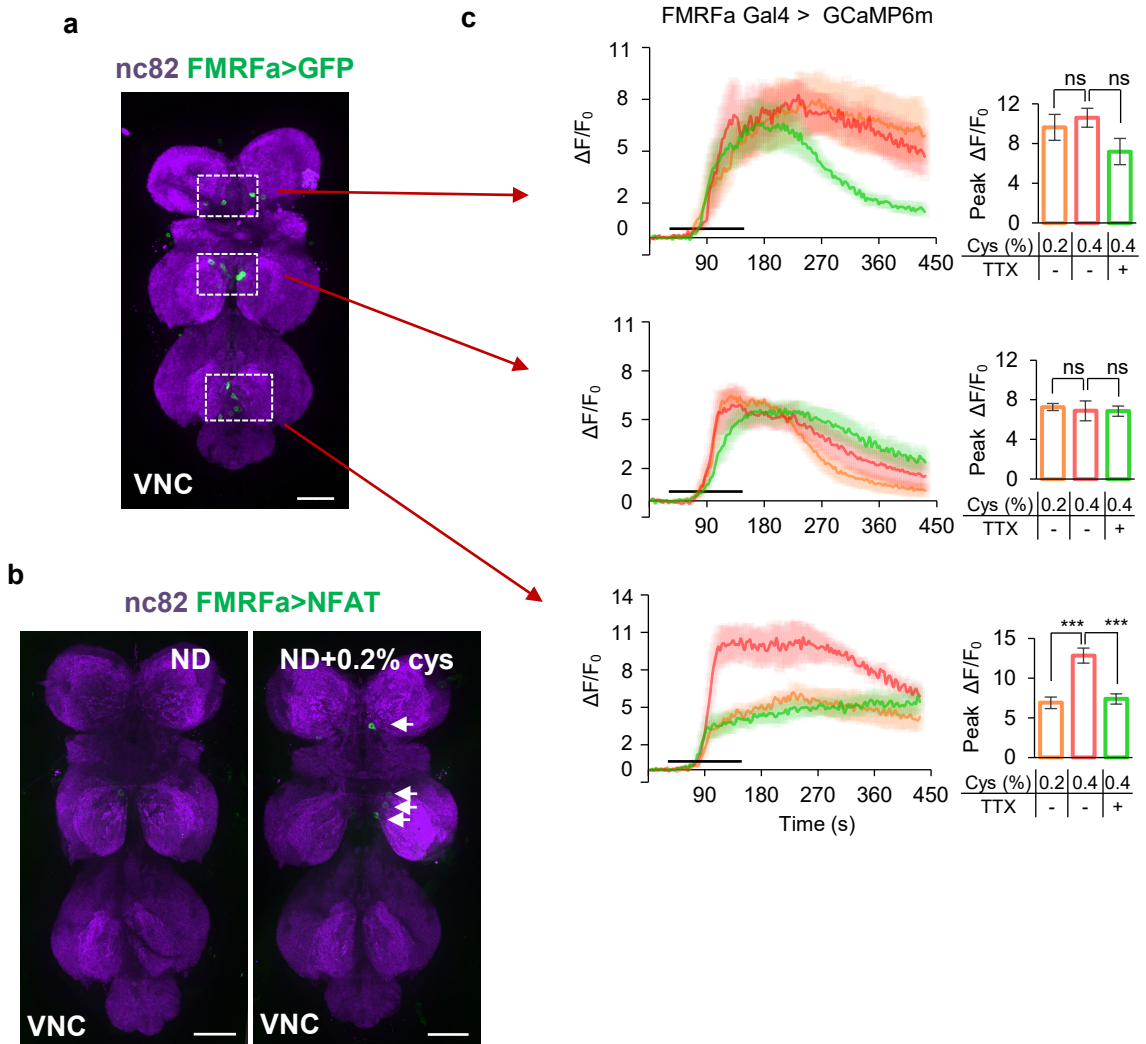

**Fig. S7: FMRFa<sup>+</sup> neurons in the VNC were directly activated by cysteine.**

**a** FMRFa expression in the VNC, illustrated by mCD8::GFP driven by *FMRFa<sup>GAL4</sup>*. Scale bar, 50  $\mu$ m. **b** The activity of FMRFa<sup>+</sup> neurons in VNC after cysteine feeding measured by NFAT system. Scale bar, 50  $\mu$ m. **c** Representative traces and quantification of ex vivo calcium responses of FMRFa<sup>+</sup> neurons during perfusion of cysteine with or without TTX (n=6). ns,  $p > 0.05$ ; \*\*\* $p < 0.001$ . One-way and two-way ANOVA followed by post hoc test with Bonferroni correction were used for multiple comparisons when applicable.
