# Supplementary material for: Dietary cysteine drives body fat loss via FMRFamide signaling in Drosophila and mouse
Source: PubMed Central journal article supplement (PMC10235132; doi:10.1038/s41422-023-00800-8), 2023-04-13
Supplement: 41422_2023_800_MOESM8_ESM.pdf [file 41422_2023_800_MOESM8_ESM.pdf]

**Fig. S8**

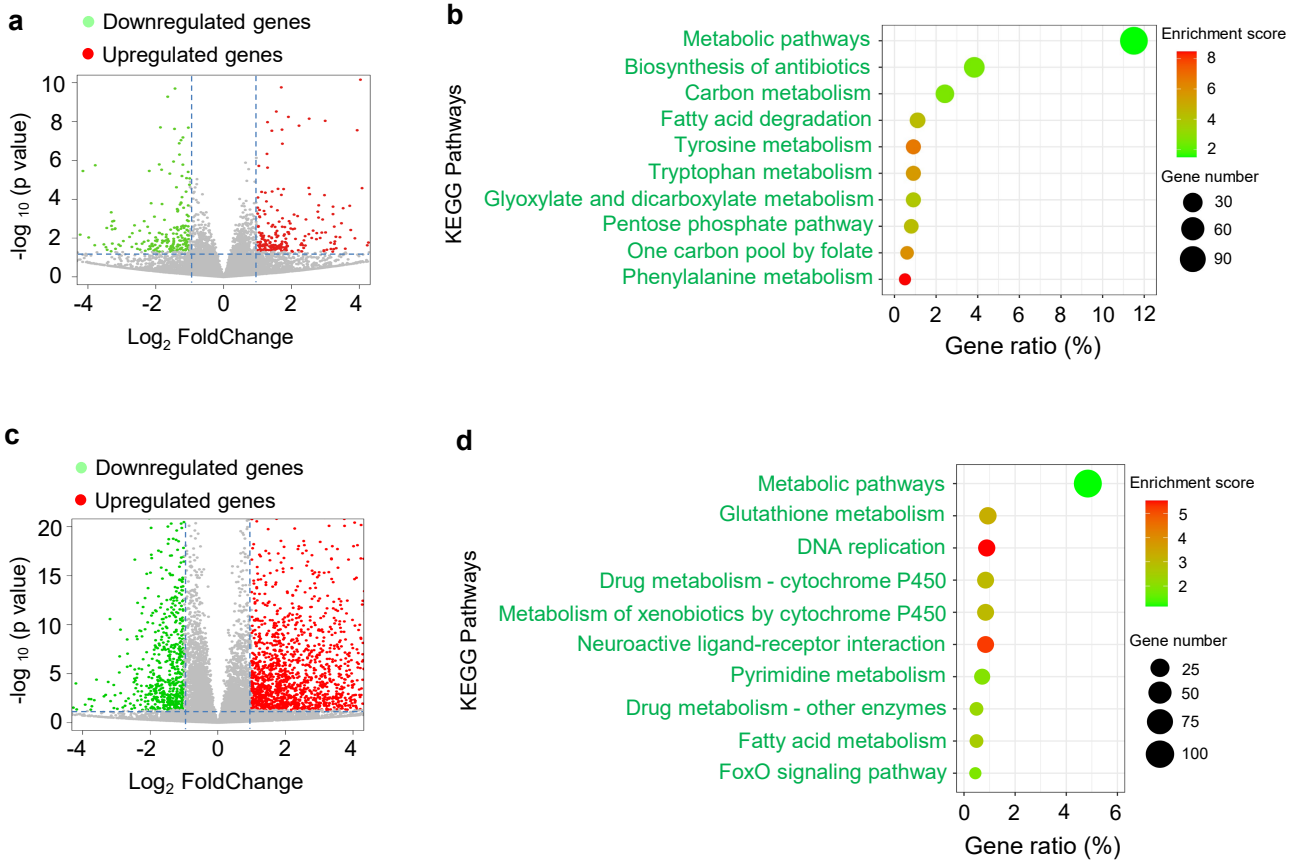

**Fig. S8: Analysis of gene expression changes in the fat body induced by dietary cysteine and FMRFa injection.**

**(a-b)** RNAseq analysis of the fat body of flies fed with 5% sucrose or 5% sucrose added with 0.2% cysteine for 5 days (n=6). **a** Volcano plot showed differentially expressed genes between the two groups (green: downregulated genes in the cysteine group; red: upregulated genes in the cysteine group). The horizontal line indicated the significance threshold ( $p = 0.05$ ), and the vertical lines indicated two-fold change threshold. **b** The top influenced signaling pathway by dietary cysteine from KEGG analysis. **(c-d)** RNAseq analysis of the fat body of flies incubated with synthetic FMRFa (20  $\mu\text{g/ml}$ ) or not (n=5-6). Volcano plot was showed in c and KEGG analysis was shown in d.
