# Supplementary material for: Dietary cysteine drives body fat loss via FMRFamide signaling in Drosophila and mouse
Source: PubMed Central journal article supplement (PMC10235132; doi:10.1038/s41422-023-00800-8), 2023-04-13
Supplement: 41422_2023_800_MOESM10_ESM.pdf [file 41422_2023_800_MOESM10_ESM.pdf]

**Fig. S10**

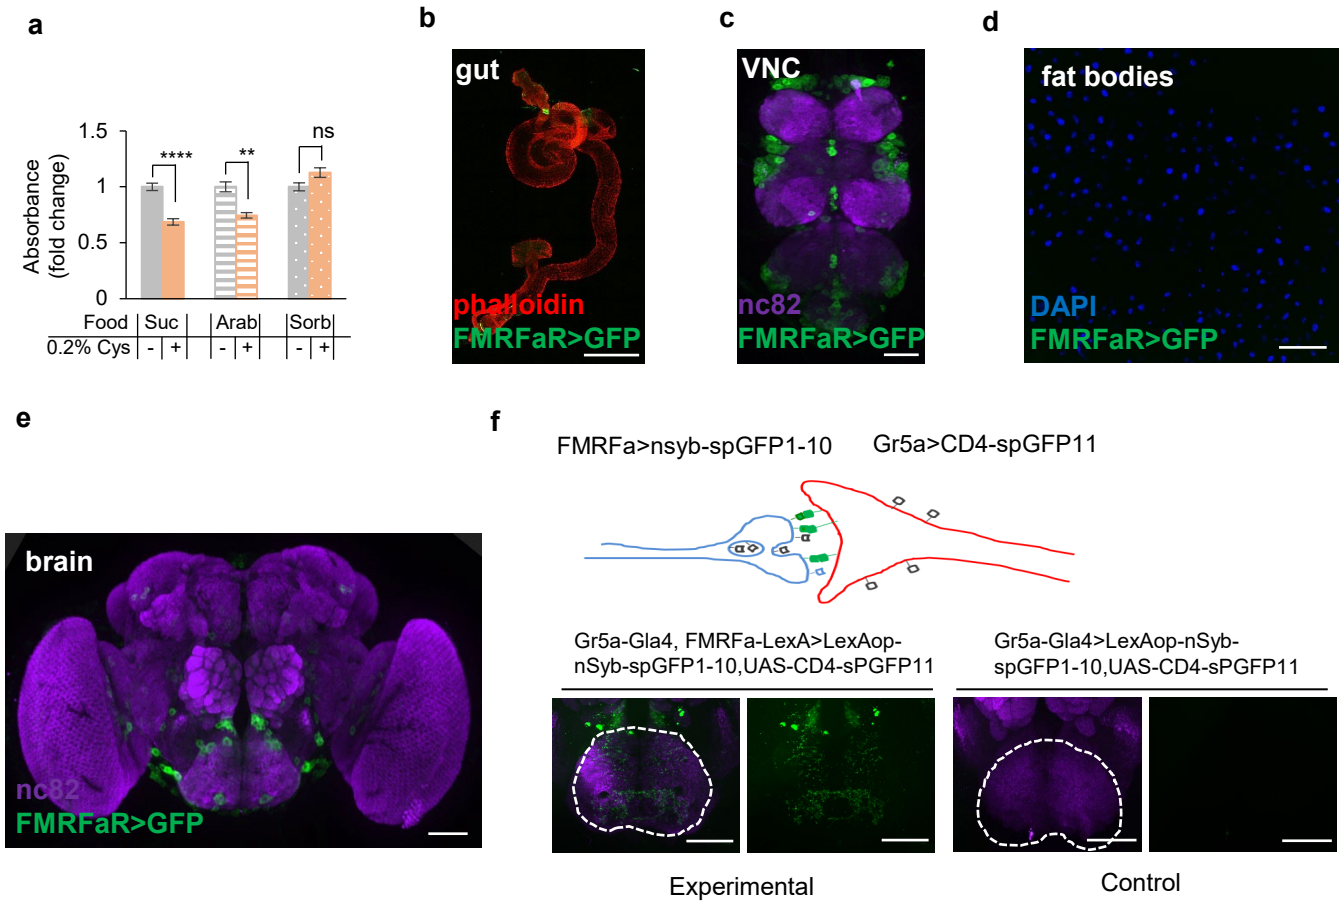

**Fig. S10: FMRFaR expression in different tissues.**

**a** Food consumption of pre-starved flies assayed with the indicated sugar types with or without 0.2% cysteine (n=6-12). **(b-e)** FMRFaR expression in the gut (**b**, Scale bar, 500  $\mu$ m), the VNC (**c**, Scale bar, 50  $\mu$ m), the fat bodies (**d**, Scale bar, 50  $\mu$ m), and the brain (**e**, Scale bar, 50  $\mu$ m), illustrated by mCD8::GFP driven by *FMRFa<sup>GAL4</sup>*. **f** (top) Schematic diagram of nSyb-GRASP between FMRFa<sup>+</sup> and Gr5a<sup>+</sup> neurons. (left) nSyb-GRASP signals between FMRFa<sup>+</sup> neurons and Gr5a<sup>+</sup> neurons in the SEZ region (dotted line). (right) In the control groups, no nSyb-GRASP signal was seen. Scale bar represents 50  $\mu$ m.
