# Supplementary material for: Dietary cysteine drives body fat loss via FMRFamide signaling in Drosophila and mouse
Source: PubMed Central journal article supplement (PMC10235132; doi:10.1038/s41422-023-00800-8), 2023-04-13
Supplement: 41422_2023_800_MOESM12_ESM.pdf [file 41422_2023_800_MOESM12_ESM.pdf]

**Fig. S12**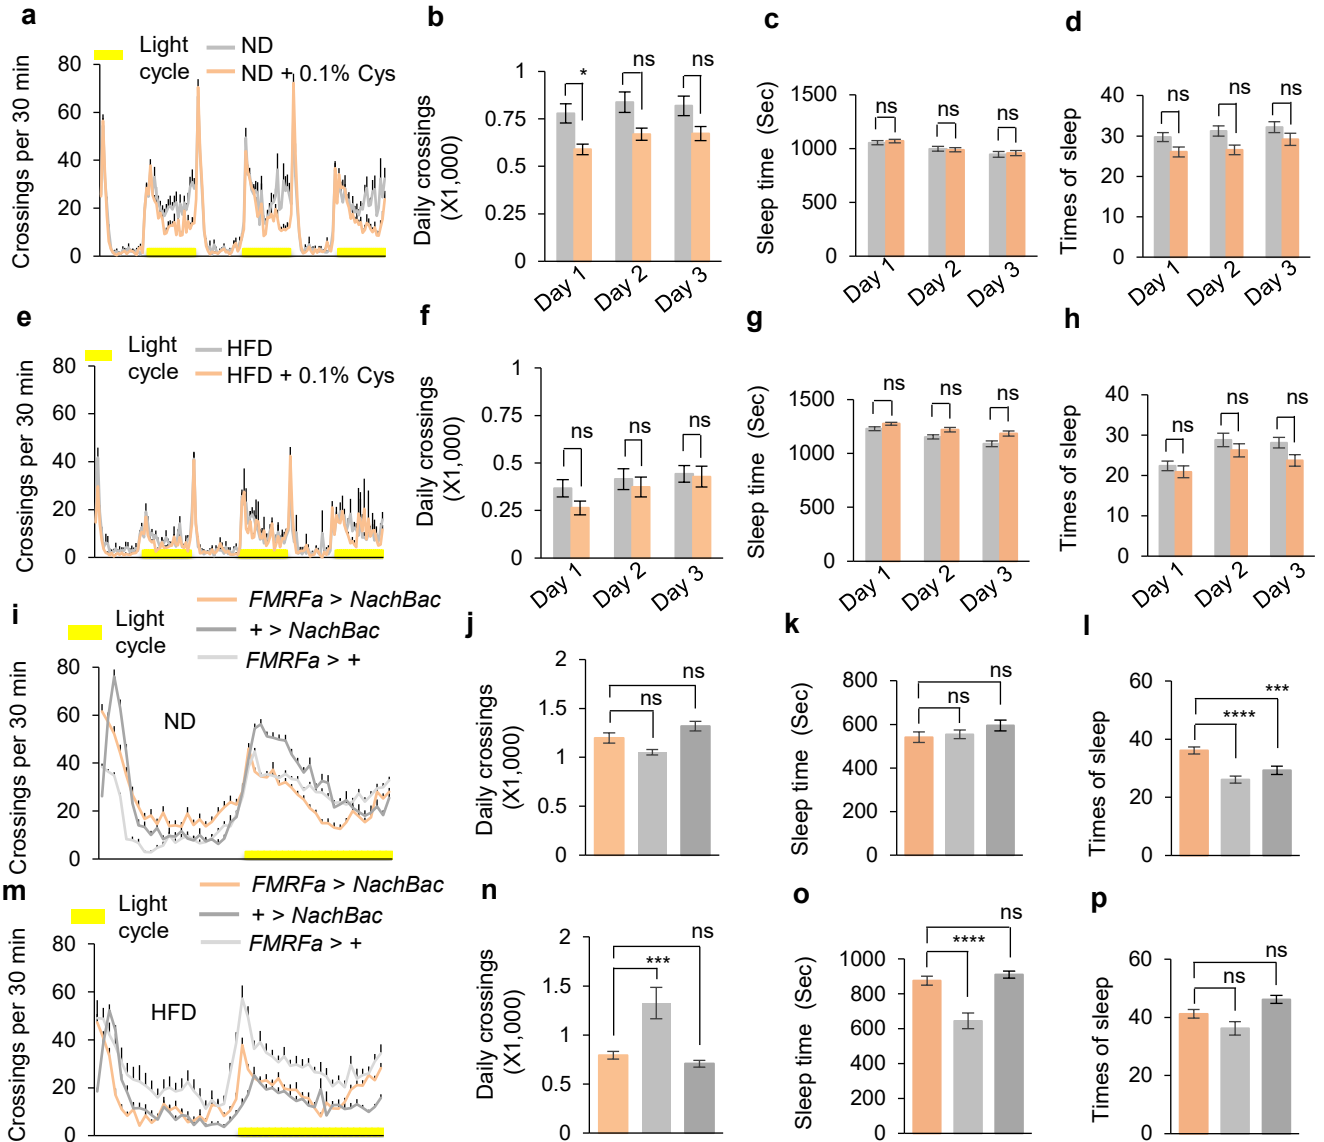**Fig. S12. Dietary cysteine and FMRFa signaling did not affect locomotion and sleep in flies.**

(a-b,e-f,i-j,m-n) Average daily midline crossing activity of flies of the indicated genotypes and food supplement using the DAMS-based locomotion assay (n=44-48). (c,g,k,o) Daily sleep time of flies of the indicated genotypes and food supplement using the DAMS-based locomotion assay (n=44-48). (d,h,l,p) Daily number of sleep bouts of flies of the indicated genotypes and food supplement using the DAMS-based locomotion assay (n=44-48). ns,  $p > 0.05$ ; \* $p < 0.05$ ; \*\*\* $p < 0.001$ ; \*\*\*\* $p < 0.0001$ .

One-way ANOVA followed by post hoc test with Bonferroni correction was used for multiple comparisons when applicable.
